# Supplementary material for: Rare Disorders: Diagnosis and Therapeutic Planning for Patients Seeking Orthodontic Treatment
Source: MDPI journal article supplement (doi:10.3390/jcm11061527), 2022-03-10
Supplement: s1 [file s1]

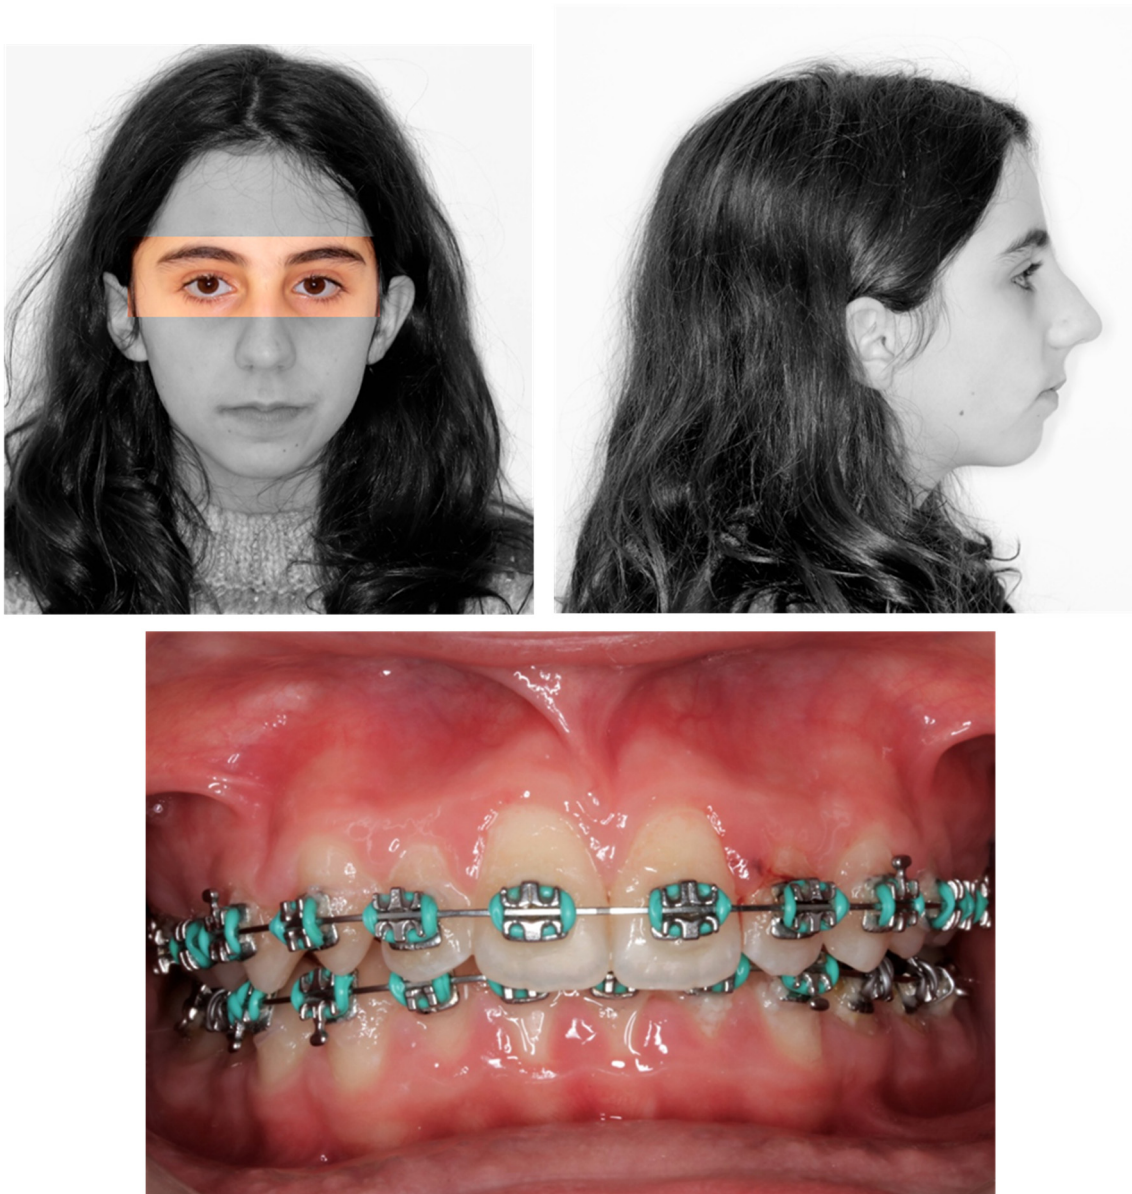

**Figure S1.** Osteogenesis imperfecta.

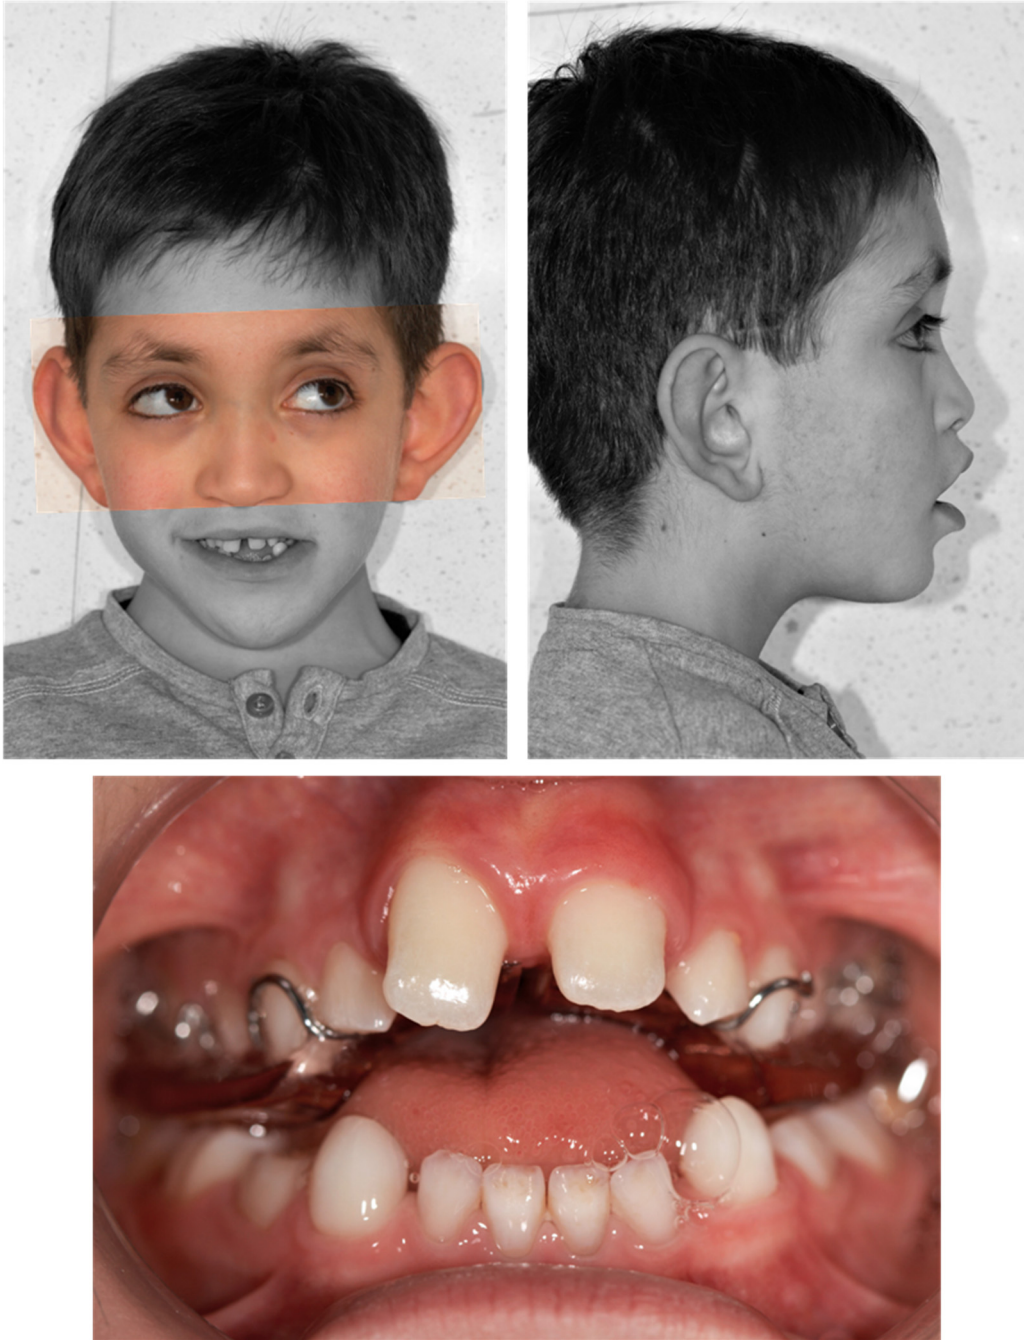

**Figure S2.** Kabuki syndrome.

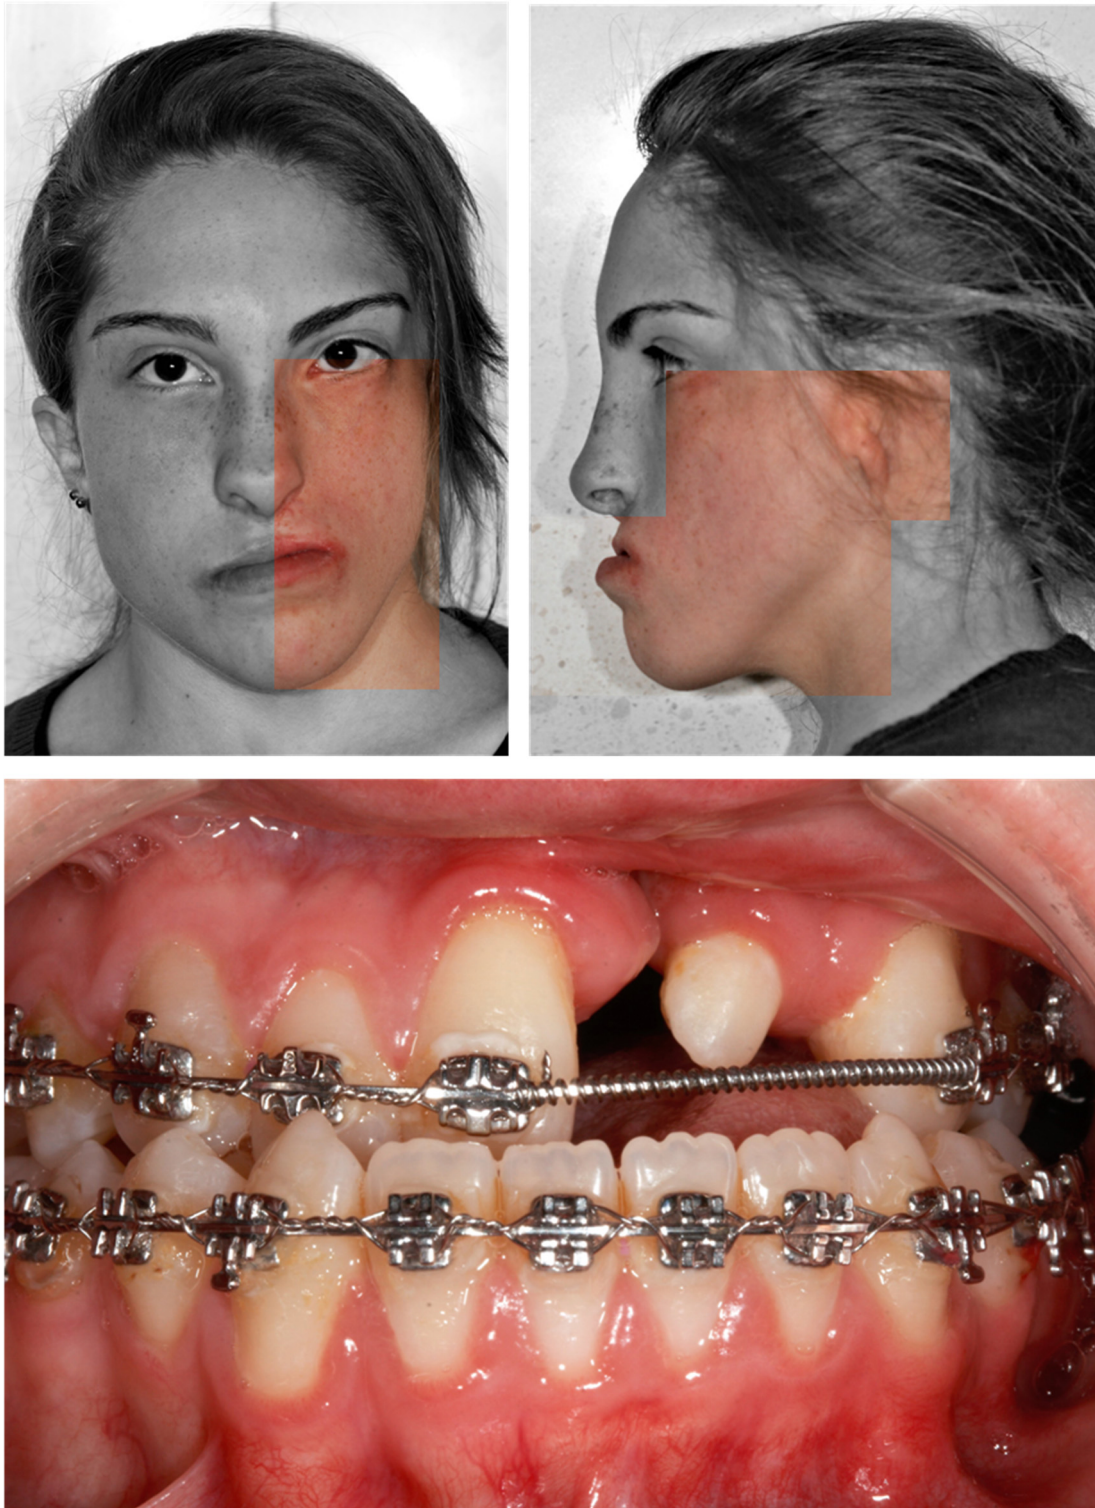

**Figure S3.** Goldenhar syndrome.



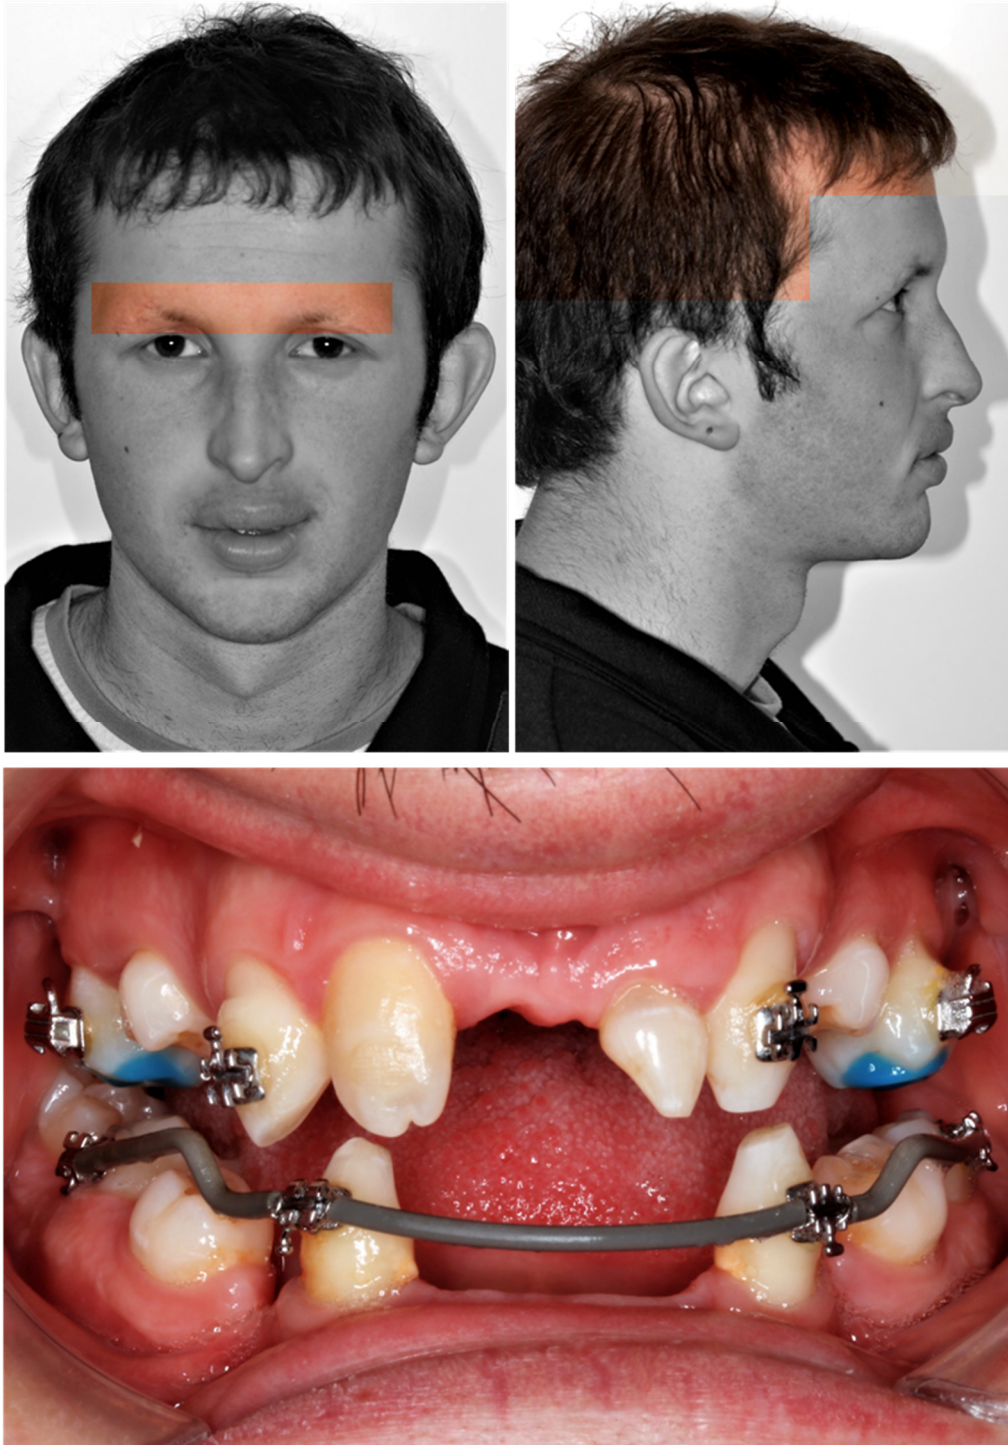

**Figure S4.** Ectodermal dysplasia.
